# Supplementary material for: Analysis of a Compartmental Model of Endogenous Immunoglobulin G Metabolism with Application to Multiple Myeloma
Source: PubMed Central journal article supplement (PMC5355465; doi:10.3389/fphys.2017.00149), 2017-03-17
Supplement: DataSheet1.pdf [file DataSheet1.pdf]

***Supplementary Material:***  
**Analysis of a Compartmental Model of  
Endogenous Immunoglobulin G Metabolism  
with Application to Multiple Myeloma**

**Felicity Kendrick, Neil D. Evans, Bertrand Arnulf, Hervé Avet-Loiseau, Olivier  
Decaux, Thomas Dejoie, Guillemette Fouquet, Stéphanie Guidez, Stéphanie  
Harel, Benjamin Hebraud, Vincent Javaugue, Valentine Richez, Susanna  
Schraen, Cyrille Touzeau, Philippe Moreau, Xavier Leleu, Stephen J. Harding  
and Michael J. Chappell\***

\*Correspondence:  
Author Name: Michael J. Chappell  
m.j.chappell@warwick.ac.uk

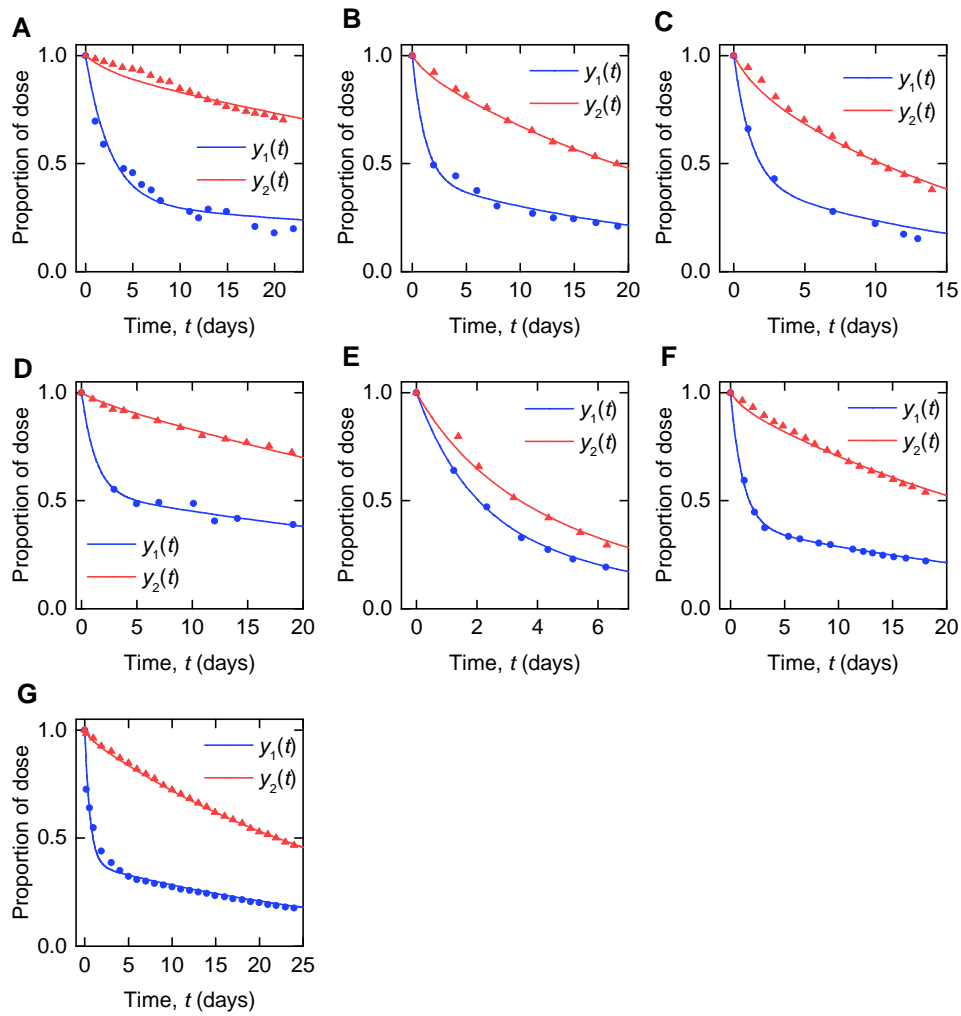

**Figure S1.** Timecourse fits: model fitted to timecourse data for (A–G) subjects A, B, C, D, E, F and G.

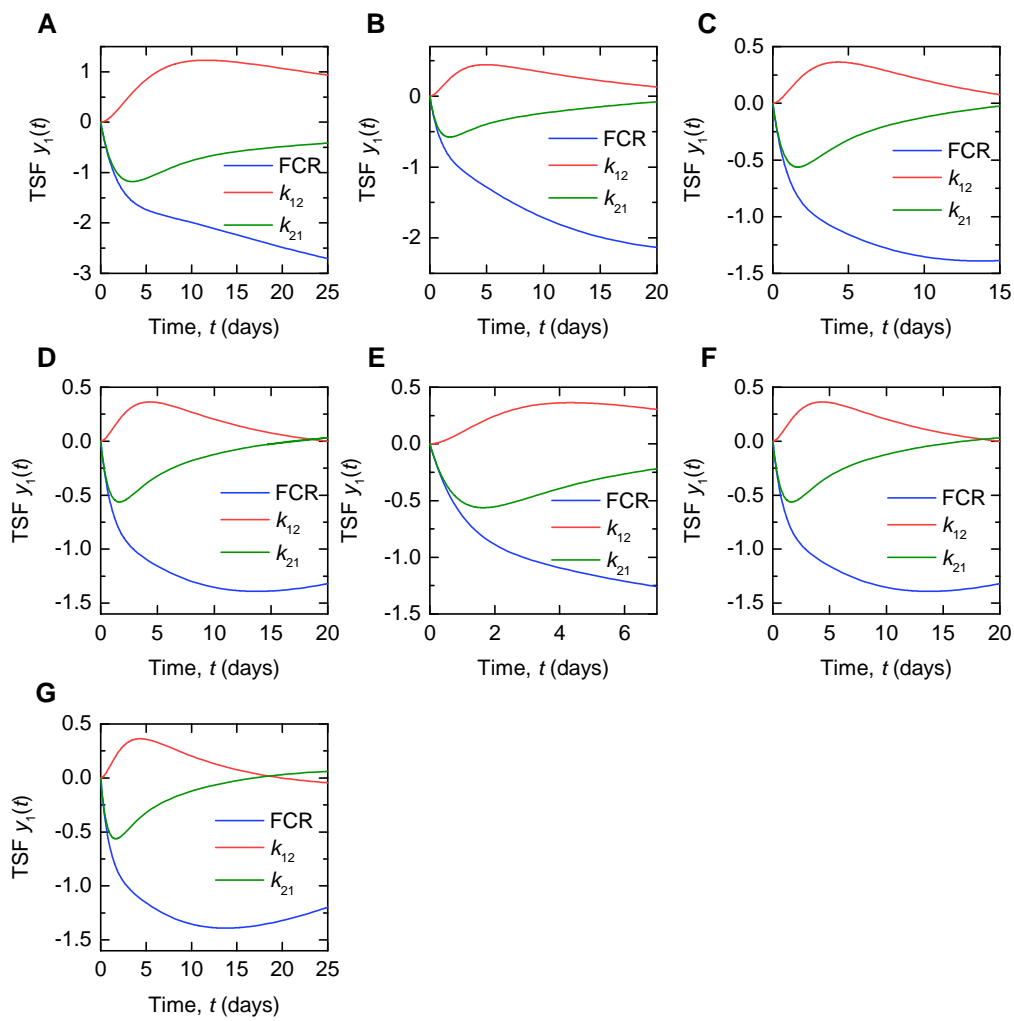

**Figure S2.** Traditional sensitivity functions (TSFs) of timecourse output  $y_1(t)$ , for (A–G) subjects A, B, C, D, E, F and G.

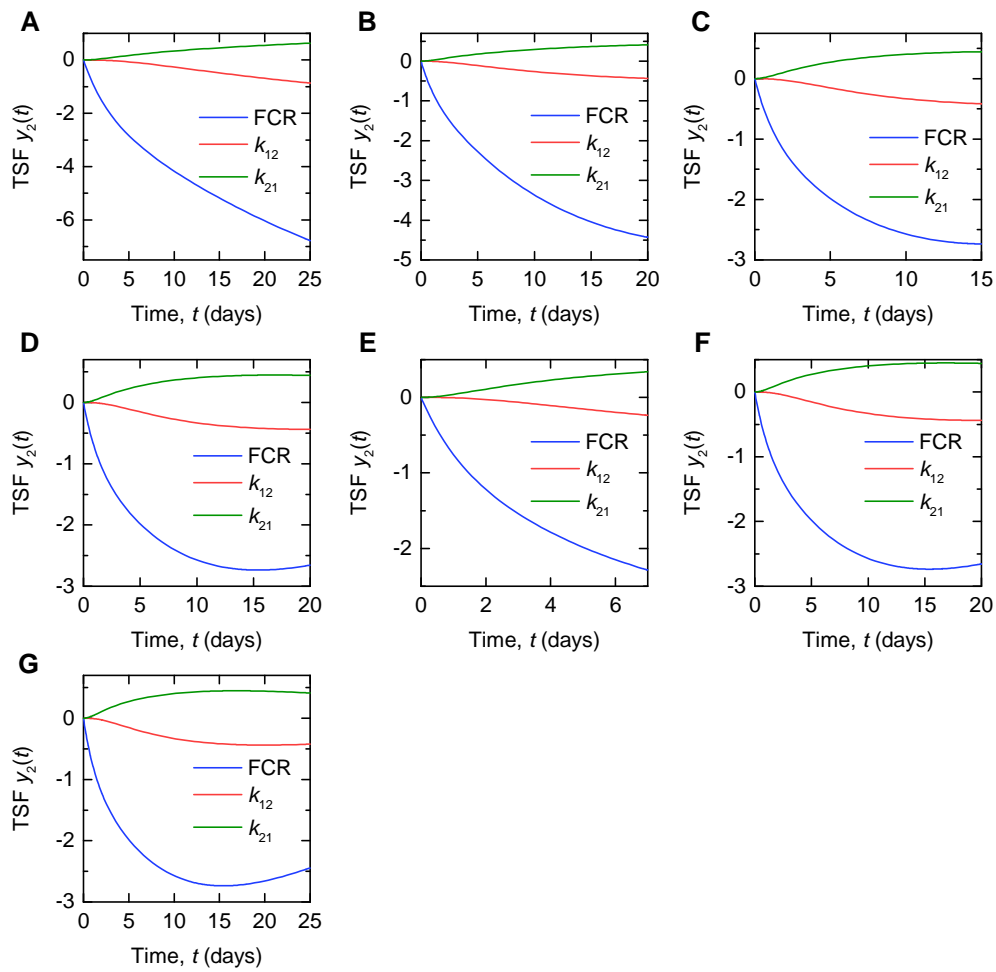

**Figure S3.** Traditional sensitivity functions (TSFs) of timecourse output  $y_2(t)$ , for (A–G) subjects A, B, C, D, E, F and G.

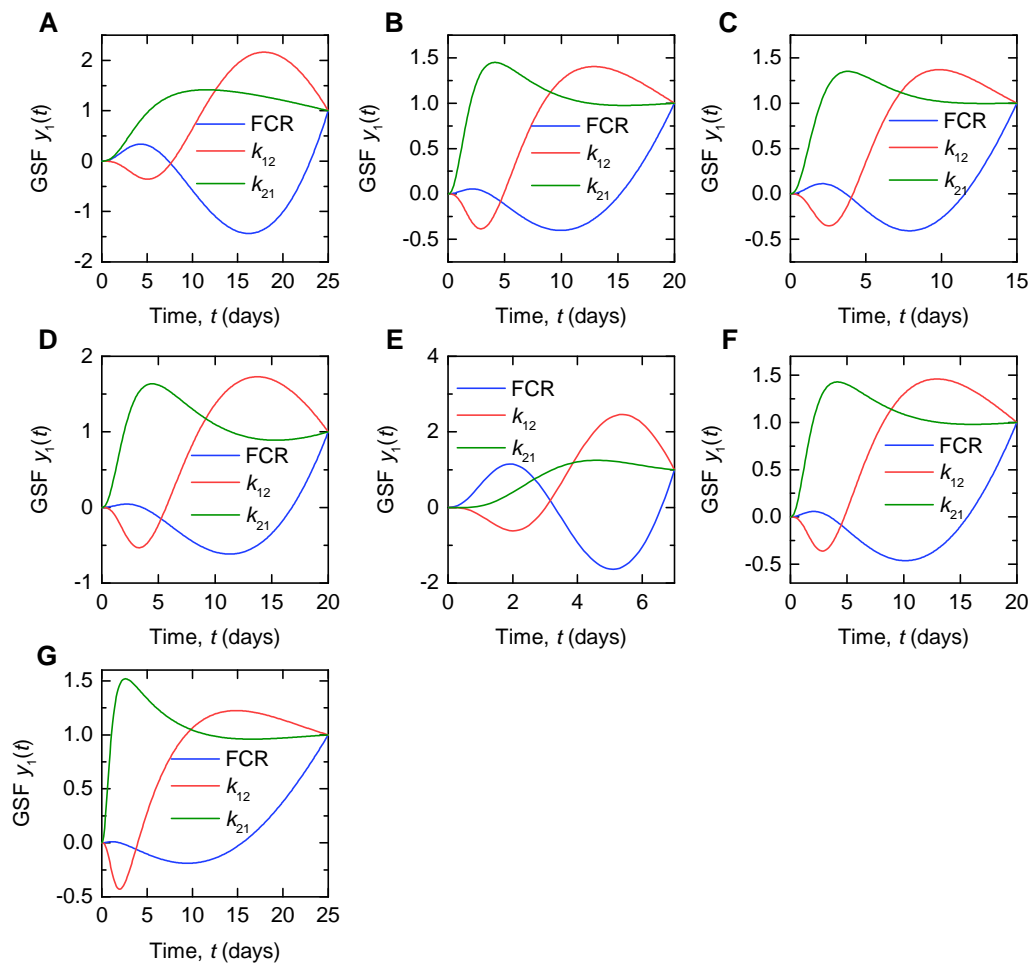

**Figure S4.** Generalised sensitivity functions (GSFs) of timecourse output  $y_1(t)$ , for (A–G) subjects A, B, C, D, E, F and G.

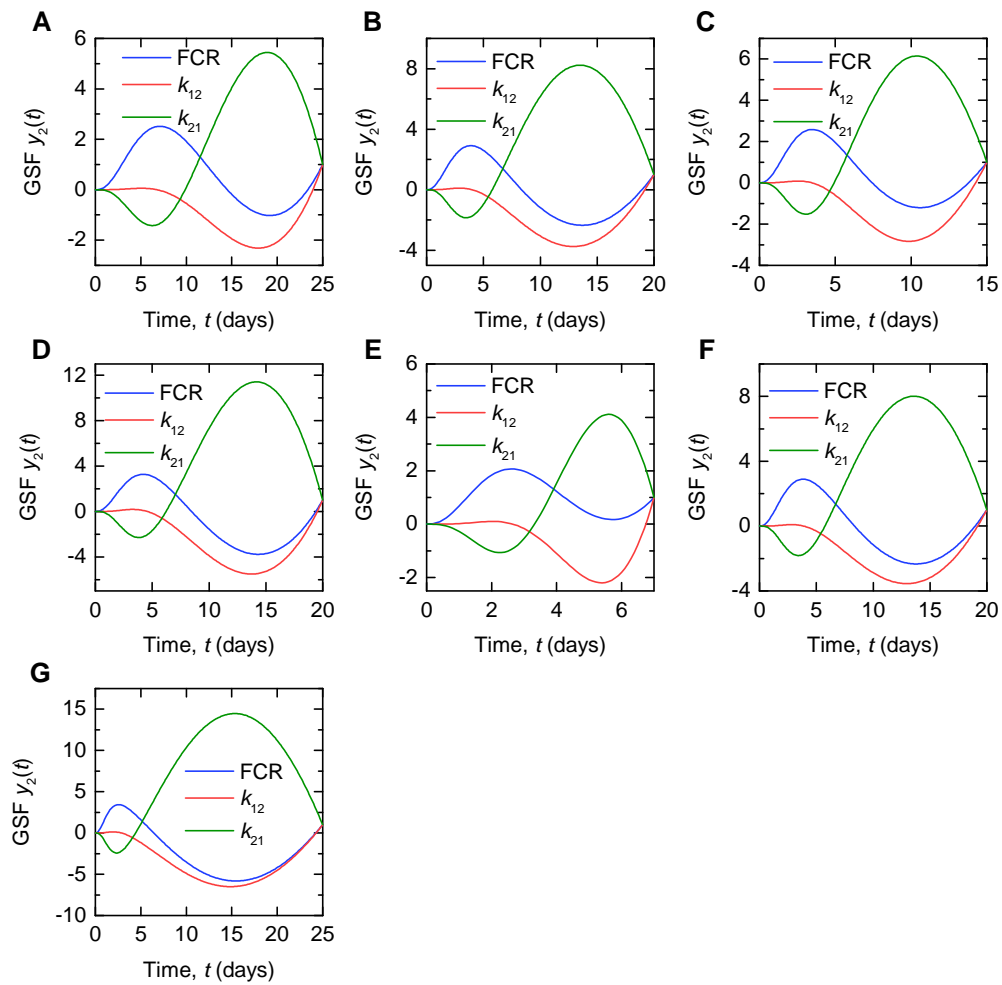

**Figure S5.** Generalised sensitivity functions (GSFs) of timecourse output  $y_2(t)$ , for (A–G) subjects A, B, C, D, E, F and G.
